# Supplementary material for: Adsorption and oxidation of propane and cyclopropane on IrO2(110)
Source: Royal Society of Chemistry journal article supplement (doi:10.1039/c8cp06125d), 2018-01-01
Supplement: c8cp06125d1.pdf [file c8cp06125d1.pdf]

## Supporting Information

### **Adsorption and Oxidation of Propane and Cyclopropane on IrO<sub>2</sub>(110)**

Rachel Martin,<sup>1,†</sup> Minkyu Kim,<sup>2,†</sup> Austin Franklin,<sup>1</sup> Yingxue Bian,<sup>1</sup> Aravind Asthagiri<sup>2</sup>  
and Jason F. Weaver<sup>1</sup>

<sup>1</sup>Department of Chemical Engineering, University of Florida, Gainesville, FL 32611, USA

<sup>2</sup>William G. Lowrie Chemical & Biomolecular Engineering, The Ohio State University, Columbus, OH 43210, USA

<sup>†</sup> Rachel Martin and Minkyu Kim contributed equally to this work.

\*To whom correspondence should be addressed, [weaver@che.ufl.edu](mailto:weaver@che.ufl.edu)

Tel. 352-392-0869, Fax. 352-392-9513

## Structure of the s-IrO<sub>2</sub>(110) layer on Ir(100)

Bulk crystalline IrO<sub>2</sub> has a tetragonal unit cell with Ir atoms surrounded by an octahedral arrangement of six oxygen atoms and each oxygen atom is coordinated with three Ir atoms resulting in a trigonal plane. Figure S1 shows a top and side view of the stoichiometrically-terminated IrO<sub>2</sub>(110) surface. The IrO<sub>2</sub>(110) surface unit cell is rectangular with dimensions of  $a = 3.16 \text{ \AA}$  and  $b = 6.36 \text{ \AA}$ , where  $a$  and  $b$  are parallel to the [001] and  $[\bar{1}10]$  directions of the IrO<sub>2</sub> crystal, respectively. The unit cell dimensions may also be expressed as  $a = 1.16x$  and  $b = 2.34x$ , where  $x = 2.72 \text{ \AA}$  is the lattice constant of Ir(100). The IrO<sub>2</sub>(110) surface consists of alternating rows of O<sub>br</sub> and Ir<sub>cus</sub> that align along the [001] direction. Each of these surface species has one dangling bond due to a decrease in coordination in comparison to bulk IrO<sub>2</sub>. H and O atoms adsorbed on top of the Ir<sub>cus</sub> row are referred to as H<sub>ot</sub> or O<sub>ot</sub>, respectively.

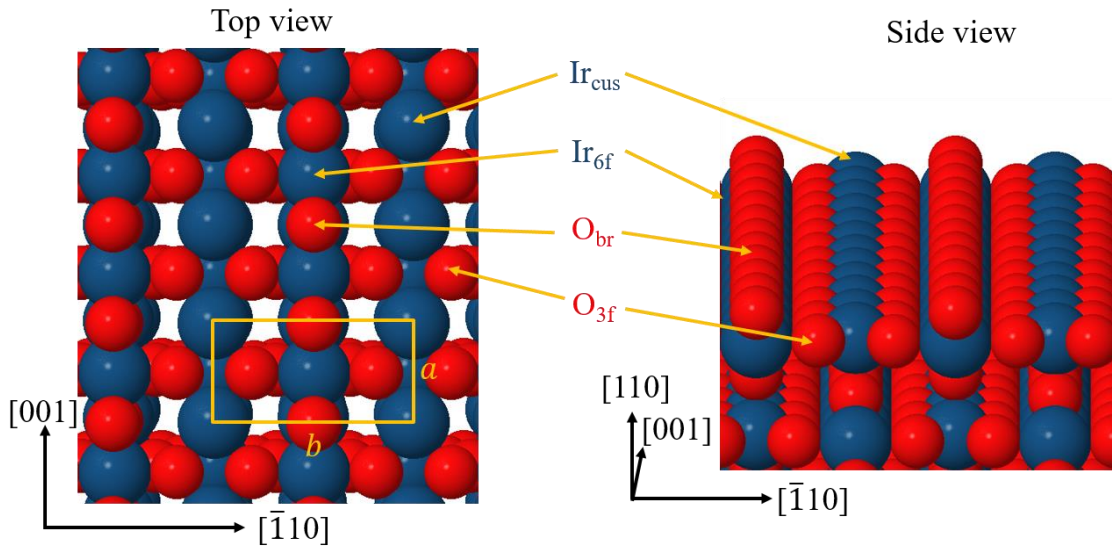

**Figure S1.** Model representation of top and side view of stoichiometric IrO<sub>2</sub>(110) structure. The red and blue atoms represent O and Ir atoms, respectively. Rows of Ir<sub>cus</sub>, Ir<sub>6f</sub>, O<sub>br</sub>, O<sub>3f</sub> along the [001] crystallographic direction are indicated. The unit cell dimensions  $a$  and  $b$  are parallel to the [001] and  $[\bar{1}10]$  directions of the IrO<sub>2</sub> crystal.

## Measurement of product yields

We estimate atomic oxygen coverages by scaling integrated O<sub>2</sub> TPD spectra with those obtained from a saturated (2 × 1)-O layer containing 0.50 ML of O-atoms and prepared by exposing the Ir(100)-(5 × 1) surface to O<sub>2</sub> in UHV.<sup>1</sup> To estimate hydrogen coverages, we scaled integrated hydrogen desorption spectra by an integrated TPD spectrum collected from a saturated Ir(100)-(5 × 1)-H layer containing 0.80 ML of atomic hydrogen that we prepared by adsorbing hydrogen to saturation on the Ir(100)-(5 × 1) surface at 300 K.<sup>2</sup> We performed TPRS experiments of CO oxidation on saturated O-covered Ir(100) to estimate the CO<sub>2</sub> desorption yields. Specifically, we collected O<sub>2</sub> and CO<sub>2</sub> TPRS spectra after exposing a (2 × 1)-O layer to a sub-saturation dose of CO and assuming that the CO<sub>2</sub> yield is equal to the difference between the initial (0.50 ML) and final coverages of oxygen as determined from the O<sub>2</sub> TPRS yield. To estimate CO desorption yields, we scaled integrated CO desorption spectra by an integrated TPD spectrum collected from a saturated c(2 × 2) layer containing 0.50 ML of CO that we prepare by adsorbing CO to saturation on Ir(100)-(1 × 1) at 300 K.<sup>1, 3-4</sup>

We performed TPRS experiments of hydrogen oxidation on partially O-covered Ir(100) to estimate the water desorption yields. In these experiments, we first collected O<sub>2</sub> and CO<sub>2</sub> TPRS spectra after exposing a (2 × 1)-O layer to a sub-saturation dose of CO and assuming that the oxygen remaining on Ir(100) is equal to the difference between the initial oxygen coverage in the (2 × 1)-O layer (0.50 ML) and the CO<sub>2</sub> yield determined from the CO<sub>2</sub> TPRS spectrum. We then collected O<sub>2</sub> and H<sub>2</sub>O TPRS spectra after exposing the partially O-covered Ir(100) surface generated from the first step to a saturation dose of hydrogen and assuming that the water yield is equal to the difference between the initial and final coverage of oxygen determined from the O<sub>2</sub> TPRS yield. We repeat these calibration TPRS experiments to ensure accuracy in our estimates of

desorption yields. We estimated  $C_3H_8$  and  $c-C_3H_6$  coverages by scaling the intensity-to-yield conversion factors determined for  $O_2$  with relative sensitivity factors (RSF) estimated for the mass spectrometric detection of these gases. We used a reported RSF value to compute the  $C_3H_8$  desorption yield,<sup>5</sup> and estimated the RSF for  $c-C_3H_6$  by scaling the  $C_3H_8$  RSF with the ratio of electron-impact ionization cross sections for  $c-C_3H_6$  and  $C_3H_8$  ( $\sim 0.81$ ) reported in the literature.<sup>6</sup>

### **TPRS spectra as a function of the $C_3H_8$ coverage on $IrO_2(110)$**

Figure S2 shows  $H_2O$ ,  $CO$ ,  $C_3H_8$  and  $CO_2$  TPRS spectra obtained as a function of the initial  $C_3H_8$  coverage generated on  $IrO_2(110)/Ir(100)$  at 90 K. We represent the  $H_2O$  and  $C_3H_8$  TPRS spectra using the measured intensities of the  $m/z = 18$  and 29 fragments, respectively, and represent the  $CO$  and  $CO_2$  TPRS spectra with the measured intensities of the  $m/z = 28$  and 44 fragments after removing the low-temperature features generated by  $C_3H_8$  fragmentation in the ionizer. We discontinued each TPRS experiment at 650 K before the  $H_2O$  TPRS feature returned to the baseline. As described in the main manuscript, limiting the final temperature to 650 K allows us to subsequently regenerate the  $IrO_2(110)$  surface by  $O_2$  treatment in UHV and thus collect TPRS data efficiently using the same oxide film. The data shows that a  $C_3H_8$  TPD peak at  $\sim 205$  K, attributed to desorption of an adsorbed  $C_3H_8$   $\sigma$ -complex, first appears after adsorbing just over 0.20 ML of propane, and the  $CO_x$  products yields begin to plateau. At a total  $C_3H_8$  coverage of 0.31 ML, the propane TPD spectra exhibit a saturated peak at 205 K and a new peak at  $\sim 150$  K that we attribute to  $C_3H_8$  associated with  $O_{br}$  atoms of the surface. This latter peak appears to downshift to  $\sim 140$  K and intensify significantly at higher propane coverage, while the peak at 205 K remains saturated.

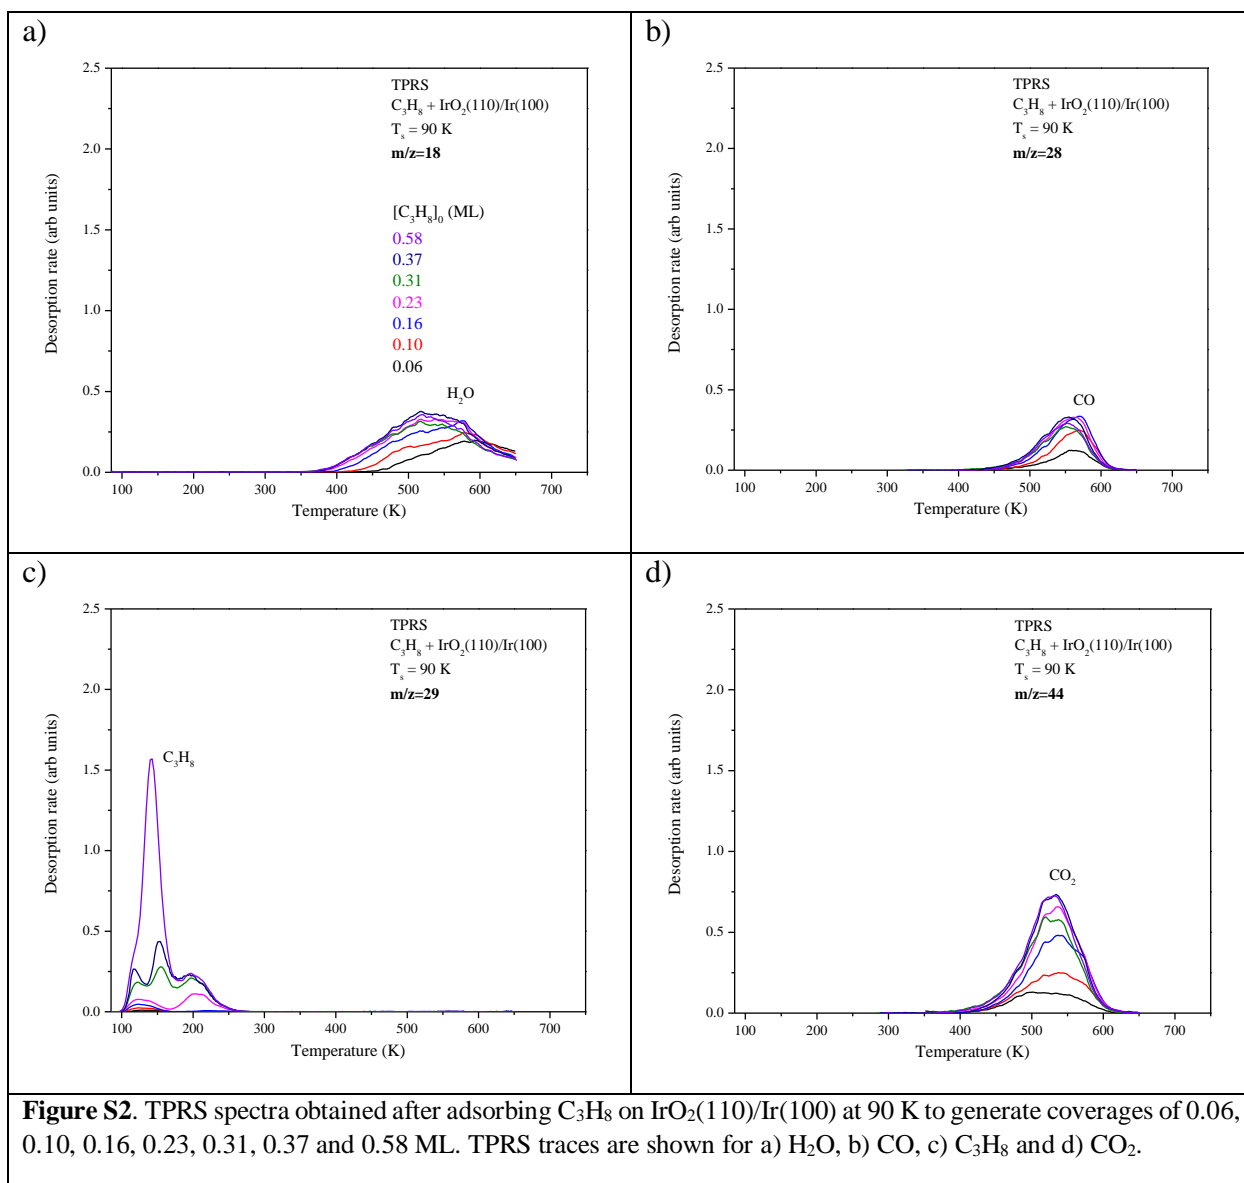

**Figure S2.** TPRS spectra obtained after adsorbing  $C_3H_8$  on  $IrO_2(110)/Ir(100)$  at 90 K to generate coverages of 0.06, 0.10, 0.16, 0.23, 0.31, 0.37 and 0.58 ML. TPRS traces are shown for a)  $H_2O$ , b)  $CO$ , c)  $C_3H_8$  and d)  $CO_2$ .

### **TPRS spectra as a function of the c-C<sub>3</sub>H<sub>6</sub> coverage on IrO<sub>2</sub>(110)**

Figure S3 shows H<sub>2</sub>O, CO, c-C<sub>3</sub>H<sub>6</sub> and CO<sub>2</sub> TPRS spectra obtained as a function of the initial C<sub>3</sub>H<sub>8</sub> coverage generated on IrO<sub>2</sub>(110)/Ir(100) at 90 K. We represent the H<sub>2</sub>O and c-C<sub>3</sub>H<sub>6</sub> TPRS spectra using the measured intensities of the  $m/z = 18$  and 42 fragments, respectively, and represent the CO and CO<sub>2</sub> TPRS spectra with the measured intensities of the  $m/z = 28$  and 44 fragments after removing the low-temperature features generated by c-C<sub>3</sub>H<sub>6</sub> fragmentation in the ionizer. We discontinued each TPRS experiment at 650 K before the H<sub>2</sub>O TPRS feature returned to the baseline. The c-C<sub>3</sub>H<sub>6</sub> TPD spectra first exhibit a peak near 145 K at a total c-C<sub>3</sub>H<sub>6</sub> coverage of 0.44 ML, with this peak intensifying and slightly downshifting with increasing c-C<sub>3</sub>H<sub>6</sub> coverage. As discussed in the main manuscript, we attribute the peak near 145 K to c-C<sub>3</sub>H<sub>6</sub> that is associated with O<sub>br</sub> atoms, and conclude that c-C<sub>3</sub>H<sub>6</sub>  $\sigma$ -complexes form in high coverages on IrO<sub>2</sub>(110) but that they all the complexes oxidize and thus do not generate a distinct c-C<sub>3</sub>H<sub>6</sub> TPD peak.

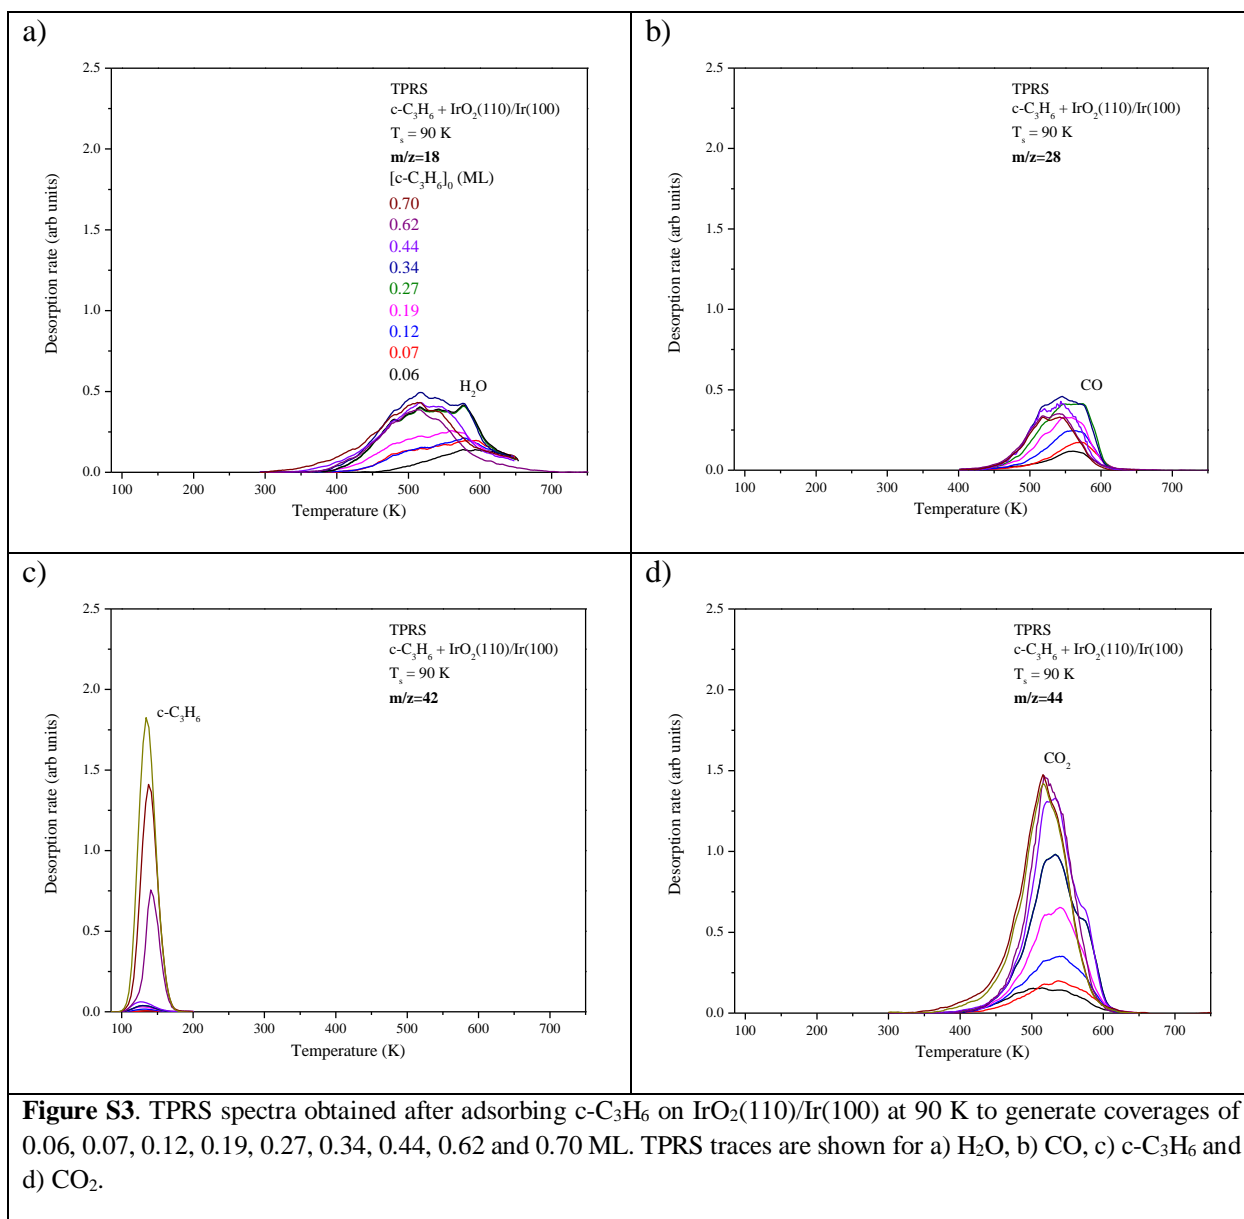

**Figure S3.** TPRS spectra obtained after adsorbing  $c\text{-C}_3\text{H}_6$  on  $\text{IrO}_2(110)/\text{Ir}(100)$  at 90 K to generate coverages of 0.06, 0.07, 0.12, 0.19, 0.27, 0.34, 0.44, 0.62 and 0.70 ML. TPRS traces are shown for a)  $\text{H}_2\text{O}$ , b)  $\text{CO}$ , c)  $c\text{-C}_3\text{H}_6$  and d)  $\text{CO}_2$ .

### Configurations of C<sub>3</sub>H<sub>8</sub> $\sigma$ -complexes on IrO<sub>2</sub>(110) predicted by DFT-D3

Figure S4 shows the four configurations of C<sub>3</sub>H<sub>8</sub>  $\sigma$ -complexes on IrO<sub>2</sub>(110) identified with DFT-D3. DFT-D3 predicts that the p-2 $\eta^1$  complex is the favored adsorbed configuration of C<sub>3</sub>H<sub>8</sub> on IrO<sub>2</sub>(110) surface.

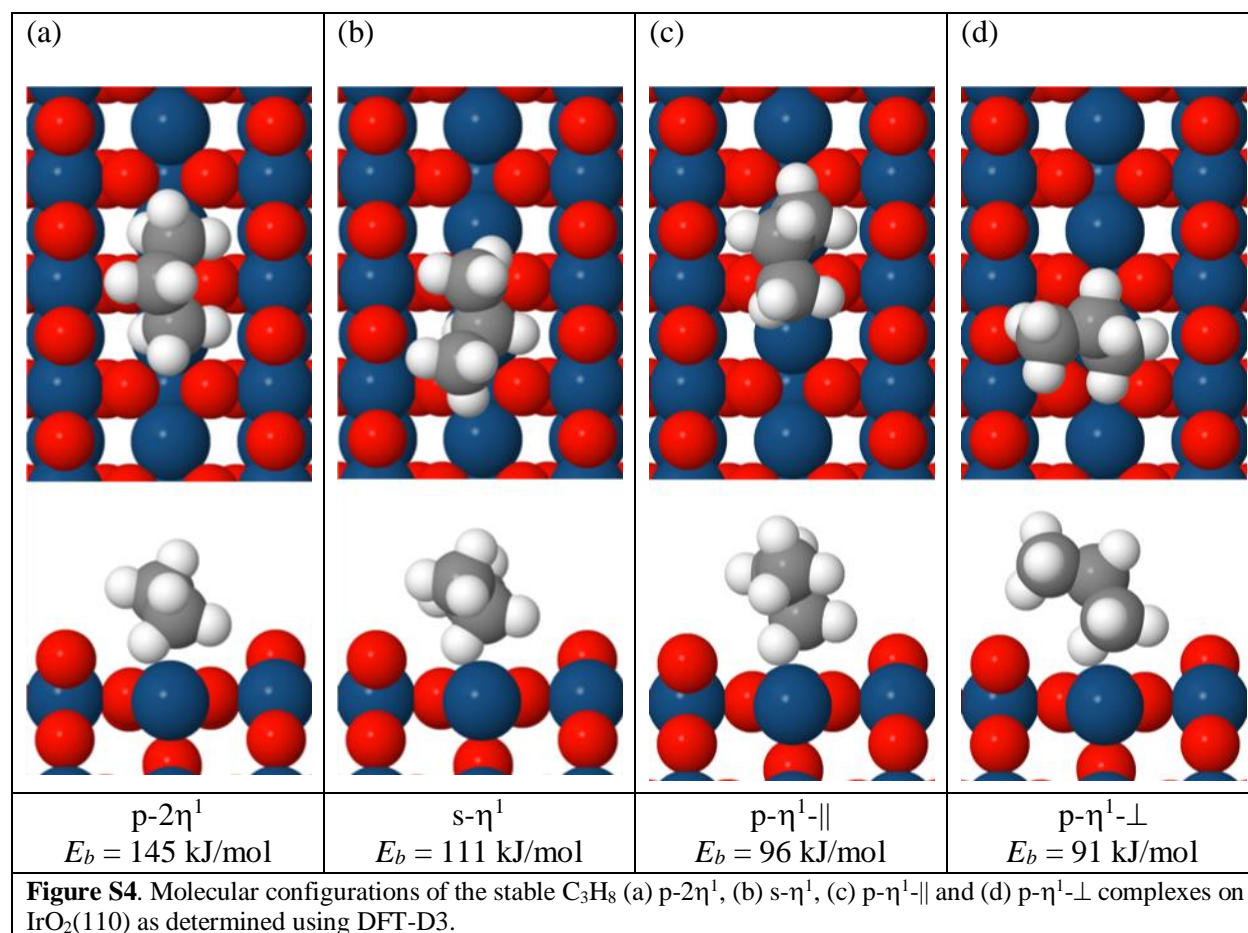



### Configurations of *c*-C<sub>3</sub>H<sub>6</sub> $\sigma$ -complexes on IrO<sub>2</sub>(110) predicted by DFT-D3

Figure S5 shows the four configurations of *c*-C<sub>3</sub>H<sub>6</sub>  $\sigma$ -complexes on IrO<sub>2</sub>(110) identified with DFT-D3. DFT-D3 predicts that the  $2\eta^1$  complex is the favored adsorbed configuration of *c*-C<sub>3</sub>H<sub>6</sub> on IrO<sub>2</sub>(110) surface.

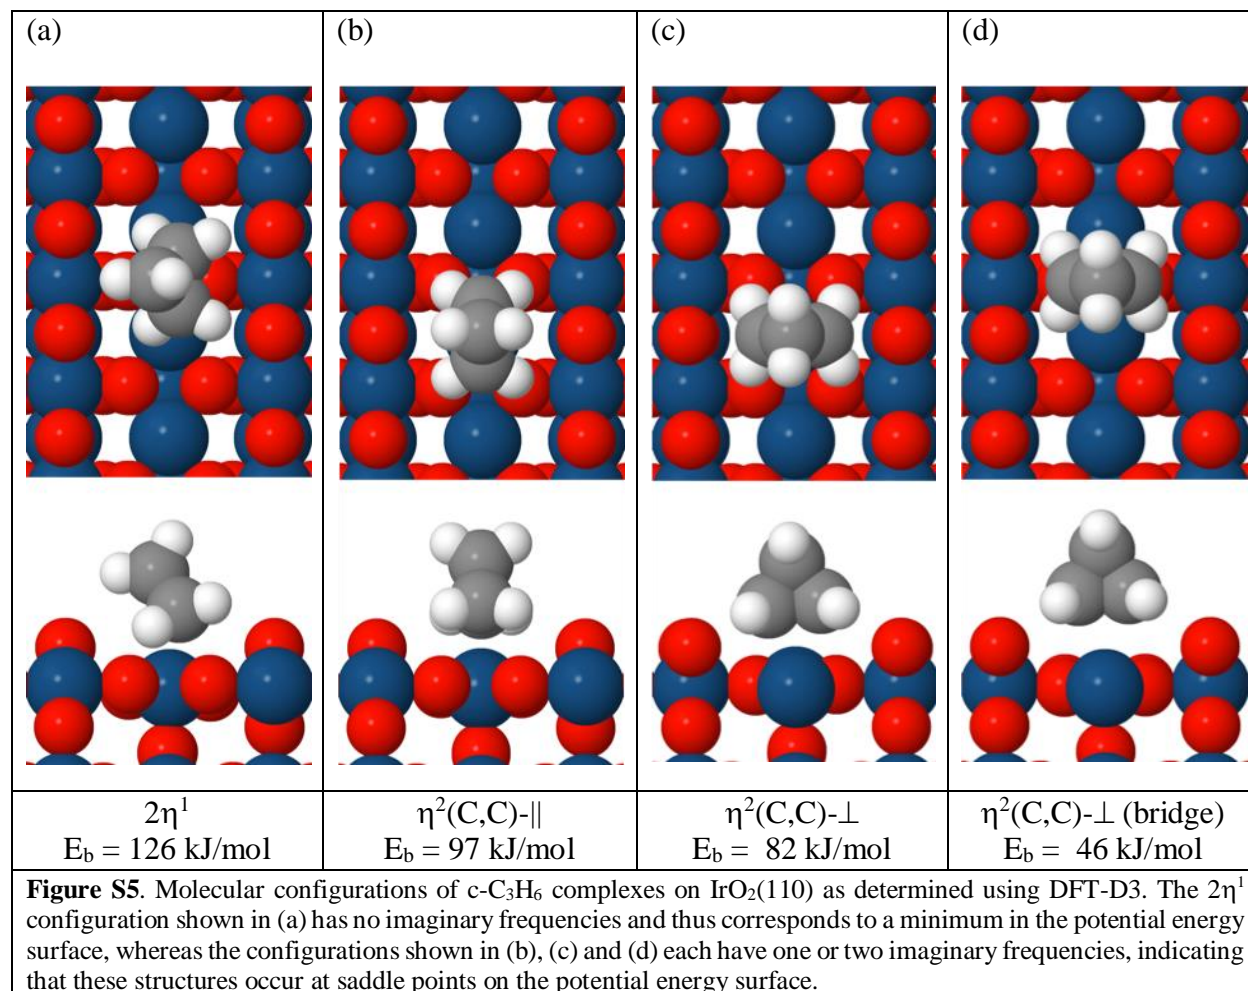

### Pathways for dehydrogenation of the bidentate C<sub>3</sub>H<sub>6</sub> intermediate on IrO<sub>2</sub>(110)

Figure S6 compares pathways computed for cleavage of a C-H bond from the different CH<sub>x</sub> groups of the C<sub>3</sub>H<sub>7</sub>(ad) species, and also lists the thermochemical barriers for subsequent C<sub>3</sub>H<sub>6</sub>(g) generation. Our calculations predict that C-H bond cleavage of the CH<sub>3</sub> group of C<sub>3</sub>H<sub>7</sub>(ad), affording the CH<sub>2</sub>CH<sub>2</sub>CH<sub>2</sub>(ad) species, is kinetically and thermodynamically preferred over C-H bond cleavage of the CH<sub>2</sub> groups. Cleavage of a C-H bond of the interior CH<sub>2</sub> group to generate an adsorbed propylene species (CH<sub>3</sub>CHCH<sub>2</sub>) is kinetically and thermodynamically disfavored relative to the other C<sub>3</sub>H<sub>7</sub>(ad) dehydrogenation reactions (Figure 8b, blue). Cleavage of a C-H bond of the terminal CH<sub>2</sub> group to produce adsorbed CH<sub>3</sub>CH<sub>2</sub>CH(ad) has a barrier of only 48 kJ/mol (Figure 8b, black), and could be kinetically competitive with C<sub>3</sub>H<sub>7</sub>(ad) dehydrogenation to CH<sub>2</sub>CH<sub>2</sub>CH<sub>2</sub>(ad) for which the barrier is 41 kJ/mol. The resulting CH<sub>3</sub>CH<sub>2</sub>CH(ad) species would preferentially dehydrogenate if O<sub>br</sub> atoms are available. Interestingly, conversion of the CH<sub>3</sub>CH<sub>2</sub>CH(ad) species to gaseous propylene has a minimum barrier that is lower than the barriers for O<sub>br</sub> regeneration (160 vs. 220-260 kJ/mol), suggesting the possibility of propylene formation at high HO<sub>br</sub> coverages. However, C<sub>3</sub>H<sub>7</sub>(ad) dehydrogenation to CH<sub>3</sub>CH<sub>2</sub>CH(ad) has a small exothermicity of 22 kJ/mol, and thus a barrier of only 70 kJ/mol is required for H-transfer to CH<sub>3</sub>CH<sub>2</sub>CH(ad) to regenerate C<sub>3</sub>H<sub>7</sub>(ad) (Figure 8b, black). In contrast, a much larger barrier (127 kJ/mol) must be overcome for the CH<sub>2</sub>CH<sub>2</sub>CH<sub>2</sub>(ad) species to be hydrogenated to C<sub>3</sub>H<sub>7</sub>(ad). The net effect is that the CH<sub>2</sub>CH<sub>2</sub>CH<sub>2</sub>(ad) species will be the dominant product of C<sub>3</sub>H<sub>7</sub>(ad) dehydrogenation on IrO<sub>2</sub>(110), and its formation ultimately results in extensive oxidation to CO<sub>x</sub> as O<sub>br</sub> atoms are regenerated.

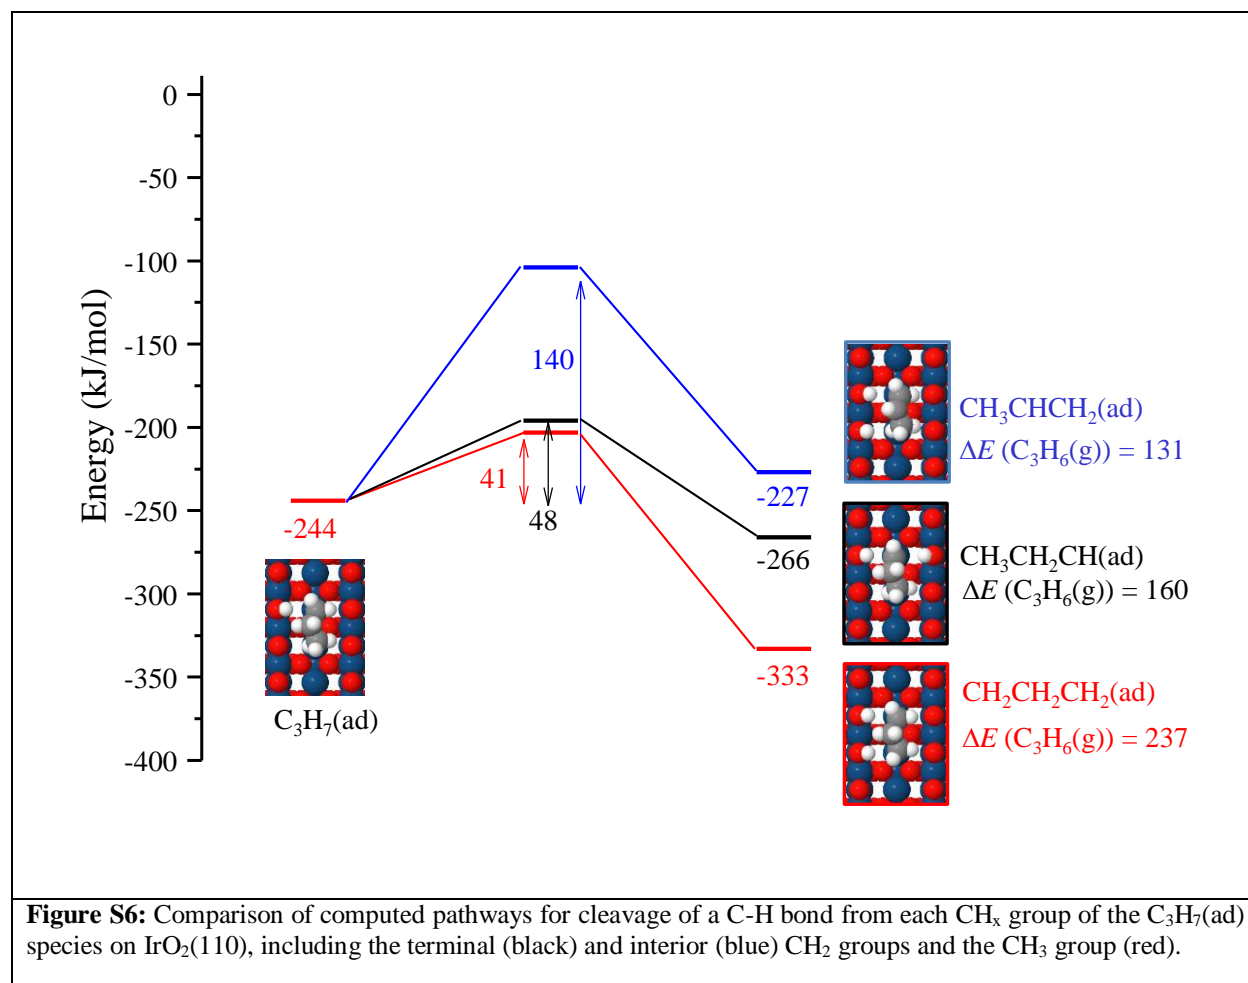

- Anic, K.; Bulchtiyarov, A. V.; Li, H.; Rameshan, C.; Rupprechter, G., "CO Adsorption on Reconstructed Ir(100) Surfaces from UHV to mbar Pressure: A LEED, TPD, and PM-IRAS Study". *J. Phys. Chem. C* **2016**, *120*, 10838-10848.
- Arman, M. A.; Klein, A.; Ferstl, P.; Valookaran, A.; Gustafson, J.; Schulte, K.; Lundgren, E.; Heinz, K.; Schneider, A.; Mittendorfer, F.; Hanuner, L.; Knudsen, J., "Adsorption of hydrogen on stable and metastable Ir(100) surfaces". *Surf. Sci.* **2017**, *656*, 66-76.
- Kisters, G.; Chen, J. G.; Lehwald, S.; Ibach, H., "Adsorption of Co on the Unreconstructed and Reconstructed Ir(100) Surface". *Surf. Sci.* **1991**, *245*, 65-71.
- Lerotholi, T. J.; Held, G.; King, D. A., "Phase mixing and phase separation accompanying the catalytic oxidation of CO on Ir{100}". *Surf. Sci.* **2007**, *601*, 1285-1295.
- Relative Sensitivity: RS measurements of gases *Application Note 282*, [https://www.hiden.de/wp-content/uploads/pdf/RS\\_Measurement\\_of\\_Gases\\_-\\_Hiden\\_Analytical\\_App\\_Note\\_282.pdf](https://www.hiden.de/wp-content/uploads/pdf/RS_Measurement_of_Gases_-_Hiden_Analytical_App_Note_282.pdf).
- Nishimura, H.; Tawara, H., "Total Electron-Impact Ionization Cross-Sections for Simple Hydrocarbon Molecules". *Journal of Physics B-Atomic Molecular and Optical Physics* **1994**, *27*, 2063-2074.
